# Supplementary material for: Side-by-Side Comparison of Post-Entry Quarantine and High Throughput Sequencing Methods for Virus and Viroid Diagnosis
Source: Biology (Basel). 2022 Feb 8;11(2):263. doi: 10.3390/biology11020263 (PMC8868628; doi:10.3390/biology11020263)
Supplement: Supplementary file 1 [file biology-11-00263-s001.zip › biology-1539752_Gauthier_etal_Supplementary_Tables_1_to_15.xlsx]

## Sheet: Supplementary_Table_1
Supplementary Table 1. Metadata of positive control plant samples. The table details the plant commodity and the species name (when available) from which the sample was derived; the tissue type from which RNA was extracted; the RNA quality assessments performed: RNA integrity number (RIN) score and 28S/18S rRNA (28S/18S) ratio; and which sequencing providers the samples were sent to for sequencin…
Sample ID	Commodity	Species	Tissue type	RIN	28S/ 18S	Sequencing providers
MT001	Citrus	Citrus Troyer x Frost-Lisbon	Leaf	8.1	1.9	SP1/SP2
MT002	Peach	Prunus persica Nectarine	Leaf, mid-rib	8.4	1.9	SP1/SP2
MT003	Citrus	Citrus aurantiifolia (Christm.) Swingle	Leaf	8.4	2	SP1/SP2
MT004	Citrus	Citrus medica L. (Etrog)	Leaf	8.1	2	SP1/SP2
MT005	Raspberry	Rubus idaeus	Leaf mid-rib, petiole	8.4	2.2	SP1/SP2
MT007	Citrus	Citrus sp.	Leaf	9	2.3	SP1
MT008	Citrus	Citrus Sweet Orange	Leaf	8.7	2.3	SP1
MT010	Grass	Miscanthus sinensis 'Morning light’	Blade	7.6	1.3	SP1/SP2
MT011	Citrus	Citrus medica L.	Leaf	8.1	2	SP1
MT012	Iris	Iris Crimson collosus 'Deep Crimson'	Spathe	7.7	1.8	SP1
MT013	Strawberry	Fragaria Alpine (Fragaria vesca)	Leaf mid-rib, petiole	8.5	2.2	SP1/SP2
MT014	Strawberry	Fragaria UC4 (Fragaria vesca hybrid)	Leaf mid-rib, petiole	8.7	2.2	SP1/SP2
MT015	Strawberry	Fragaria sp.	Leaf mid-rib, petiole	8.5	2.3	SP1
MT016	Sweet potato	Ipomoea batatas GRF0334	Leaf	8.7	2.2	SP1/SP2

## Sheet: Supplementary_Table_2
Supplementary Table 2. Post-entry quarantine molecular assays performed on control plants used in this study. PCR pri-mers and amplification conditions for each assay are summarized along with reference publica-tions from which the assays were implemented. BSA = Bovine Serum Albumin, ssRNA(+) = positive single-stranded RNA.
Virus/Viroid	Acronym	Genus	Family	Genome	Positive detection in PEQ	Primers	PCR reaction (20 µL)	PCR cycle	Reference
Citrus exocortis viroid	CEVd	Pospiviroid	Pospiviroidae	single stranded circular RNA	Multiplex qPCR for citrus viroids	FWD GTCGCCGCGGATCACT REV CCAGCAGCGAAAGGAGGA Probe FAM-CCAGCGGAGAAACAG	2.0 µL cDNA template 10 µL GoTaq probe qPCR mastermix 4.0 µL nuclease-free water 1.0 µL forward primer (5µM) 1.0 µL reverse primer (5µM) Probe (2.5µM) 1.0 µL BSA (10mg/mL)	95ºC for 10 min 37 x 95ºC for 15 sec, 56ºC for 60 sec	Lin CY, Wu ML, Shen TL, Yeh HS and Hung TH (2015) Multiplex detection, distribution, and genetic diversity of Hop stunt viroid and Citrus exocortis viroid infecting citrus in Taiwan. Virology Journal 12, 11, Article number: 11. https://doi.org/10.1186/s12985-015-0247-y
Citrus tristeza virus	CTV	Closterovirus	Closteroviridae	ssRNA(+)	CTV-specific PCR	FWD ATGTCAGGCAGCTTGGGAAATT REV TTCGTGTCTAAGTCRCGCTAAACA	2.0 µL cDNA template 10 µL GoTaq Green Master Mix 5.0 µL nuclease-free water 1.0 µL forward primer (5µM) 1.0 µL reverse primer (5µM) 1.0 µL BSA (10mg/mL)	94ºC for 5 min 37 x 94ºC for 30 sec, 59ºC for 90 sec, 72ºC for 60 sec 72ºC for 10 min	Roy A, Fayad A, Barthe G and Brlansky RH (2005) A multiplex polymerase chain reaction method for reliable, sensitive and simultaneous detection of multiple viruses in citrus trees. Journal of virological methods 129: 47-55. https://doi.org/10.1016/j.jviromet.2005.05.008
Citrus dwarfing viroid	CDVd	Apscaviroid	Pospiviroidae	single stranded circular RNA	PCR for CVd-IIIa, b & c	FWD CTCCGCTAGTCGGAAAGACTCCGC REV TCACCAACTTAGCTGCCTTCGTC	2.0 µL cDNA template 10 µL GoTaq Green Master Mix 5.0 µL nuclease-free water 1.0 µL forward primer (5µM) 1.0 µL reverse primer (5µM) 1.0 µL BSA (10mg/mL)	94ºC for 2 min 37 x 94ºC for 30 sec, 63ºC for 30 sec, 72ºC for 30 sec 72ºC for 7 min	Rakowski AG, Szychowski JA, Avena ZS and Semancik JS (1994) Nucleotide sequence and structural features of the Group III citrus Viroids. Journal of General Virology 75(12): 3581-3587. https://doi.org/10.1099/0022-1317-75-12-3581 Puchta H, Ramm K, Luckinger R, Hadas R, Bar-Joseph M and Sanger H (1991) Primary and secondary structure fo citrus viroid IV (Cvd IV), a new chimeric viroid present in dw…
Citrus viroid VI	CVd-VI	Apscaviroid	Pospiviroidae	single stranded circular RNA	CVd-VI-specific PCR	FWD CGTCGACGAAGGCATGTGAGCTT REV GTCCGCTCGACTAGCGGCAGAGAGC	2.0 µL cDNA template 10 µL GoTaq Green Master Mix 5.0 µL nuclease-free water 1.0 µL forward primer (5µM) 1.0 µL reverse primer (5µM) 1.0 µL BSA (10mg/mL)	94ºC for 2 min 37 x 94ºC for 30 sec, 62ºC for 30 sec, 72ºC for 30 sec 72ºC for 7 min	Ito T, Ieki H, Ozaki K, Ito T, Nakahara K, Hataya T, Ito T, Isaka M and Kano T (2002) Multiple citrus viroids in Citrus from Japan and their ability to produce exocortis-like symptoms in citron. Virolology 92(5):542–547. https://doi.org/10.1094/phyto.2002.92.5.542
Citrus vein enation virus	CVEV	Enamovirus	Luteoviridae	ssRNA(+)	CVEV-specific 1 step PCR with a step of reverse trascription for cDNA synthesis	FWD CGGGGCTTGGATTCTCAAAGG REV CAACTGACTCCAACGCGTCGTC	2.0 µL RNA template 10 µL XLT 2X reaction mix 3.3 µL nuclease-free water 0.8 µL qScript 1.0 µL forward primer (10µM) 1.0 µL reverse primer (10µM) 1.0 µL BSA (10mg/mL) 0.5 µL 25mM MgCl2 0.4 µL Dye	42ºC for 45 min 94ºC for 2 min 37 x 94ºC for 20 sec, 65ºC for 40 sec, 72ºC for 20 sec 72ºC for 7 min	Vives MC, Valazquaez K, Pina JA, Moreno P, Guerri J and Navarro L (2013) Identification of a new enamovirus associated with citrus vein enation disease by deep sequencing of small RNAs. Journal of Phytopathology 103(10): 1077-1085. https://doi.org/10.1094/PHYTO-03-13-0068-R
Hop stunt viroid	HSVd	Hostuviroid	Pospiviroidae	single stranded circular RNA	HSVd-specific 1 step PCR with a step of reverse trascription for cDNA synthesis	FWD CCGGGGCAACTCTTCTCAGAATCCA REV GGCTCCTTTCTCAGGTAAG	2.0 µL RNA template 10 µL XLT 2X reaction mix 3.8 µL nuclease-free water 0.8 µL qScript 1.0 µL forward primer (5µM) 1.0 µL reverse primer (5µM) 1.0 µL BSA (10mg/mL) 0.4 µL Dye	50ºC for 30 min 94ºC for 3 min 35 x 94ºC for 30 sec, 55ºC for 30 sec, 72ºC for 45 sec 72ºC for 7 min	Hadidi A, Terai Y, Powell CA, Scott SW, Desvignes JC, Ibrahim LM and Levy L (1992) Enzymatic cDNA amplification of hop stunt viroid variants from naturally infected fruit crops. Acta Horticulturae 309: 339-344. 10.17660/ActaHortic.1992.309.49
Iris severe mosaic virus	ISMV	Potyvirus	Potyviridae	ssRNA(+)	Generic potyvirus 1 step PCR with a step of reverse trascription for cDNA synthesis	FWD GTITGYGTIGAYGAYTTYAAYAA REV TCIACIACIGTIGAIGGYTGNCC	2.0 µL RNA template 10 µL XLT 2X reaction mix 3.8 µL nuclease-free water 0.8 µL qScript 1.0 µL forward primer (10µM) 1.0 µL reverse primer (10µM) 1.0 µL BSA (10mg/mL) 0.4 µL Dye	50ºC for 30 min 94ºC for 3 min 37 cycles of 94ºC for 30 sec, 45ºC for 30 sec, 72ºC for 45 sec 72ºC for 7 min	Zheng L, Rodoni BC, Gibbs MJ and Gibbs AJ (2010) A novel pair of universal primers for the detection of potyviruses. Plant Pathology 59: 211-220. https://doi.org/10.1111/j.1365-3059.2009.02201.x
Prunus necrotic ringspot virus	PNRSV	Ilarvirus	Bromoviridae	ssRNA(+) tripartite	Generic Bromoviridae PCR	FWD GCNGGWTGYGGDAARWCNAC REV AMDGGWAYYTGYTYNGTRTCACC	2.0 µL cDNA template 10 µL GoTaq Green Master Mix 5.0 µL nuclease-free water 1.0 µL reverse primer (20µM) 1.0 µL forward primer (20µM) 1.0 µL BSA (10mg/ml)	95ºC for 2 min 35 x 95ºC for 30 sec, 48ºC for 30 sec, 72ºC for 30 sec 72ºC for 10 min	Univertos M, Perez-Egusquiza Z, Clover G (2010) PCR assays for the detection of members of the genus Ilarvirus and family Bromoviridae. Journal of Virological Methods 165: 97-104. 10.1016/j.jviromet.2010.01.011
Raspberry bushy dwarf virus RNA1	RBDV	Idaeovirus	Mayoviridae	ssRNA(+) bipartite	Generic Bromoviridae PCR	FWD GCNGGWTGYGGDAARWCNAC REV AMDGGWAYYTGYTYNGTRTCACC	2.0 µL cDNA template 10 µL GoTaq Green Master Mix 5.0 µL nuclease-free water 1.0 µL reverse primer (20µM) 1.0 µL forward primer (20µM) 1.0 µL BSA (10mg/mL)	95ºC for 2 min 35 x 95ºC for 30 sec 48ºC for 30 sec 72ºC for 30 sec 72ºC for 10 min	Univertos M, Perez-Egusquiza Z, Clover G (2010) PCR assays for the detection of members of the genus Ilarvirus and family Bromoviridae. Journal of Virological Methods 165: 97-104. 10.1016/j.jviromet.2010.01.011
Sorghum mosaic virus	SrMV	Potyvirus	Potyviridae	single stranded circular RNA	Generic potyvirus 1 step PCR with a step of reverse trascription for cDNA synthesis	FWD GTITGYGTIGAYGAYTTYAAYAA REV TCIACIACIGTIGAIGGYTGNCC	2.0 µL RNA template 10 µL XLT 2X reaction mix 3.8 µL nuclease-free water 0.8 µL qScript 1.0 µL forward primer (10µM) 1.0 µL reverse primer (10µM) 1.0 µL BSA (10mg/mL) 0.4 µL Dye	50ºC for 30 min 94ºC for 3 min 37 cycles of 94ºC for 30 sec, 45ºC for 30 sec, 72ºC for 45 sec 72ºC for 7 min	Zheng L, Rodoni BC, Gibbs MJ and Gibbs AJ (2010) A novel pair of universal primers for the detection of potyviruses. Plant Pathology 59: 211-220. https://doi.org/10.1111/j.1365-3059.2009.02201.x
Strawberry mottle virus	SMoV	Sadwavirus	Secoviridae	ssRNA(+) bipartite	SMoV-specific PCR	FWD TAAGCGACCACGACTGTGGACAAAG REV ATTCGGTTCACGTCCTAGTCTCAC	2.0 µL cDNA template 10 µL GoTaq Green Master Mix 5 µL nuclease-free water 1.0 µL forward primer (10µM) 1.0 µL reverse primer (10µM) 1.0 µL BSA (10mg/mL)	94ºC for 2 min 37 x 94ºC for 1 min, 50ºC for 1 min, 72ºC for 1 min 72ºC for 5 min	Thompson J and Jelkman W (2003) The detection and variation of strawberry mottle virus. Journal of Plant Disease 87: (4) 385-390. https://doi.org/10.1094/PDIS.2003.87.4.385
Sweet potato feathery mottle virus	SPFMV	Potyvirus	Potyviridae	ssRNA(+)	PCR for SPFMV and Sweet potato virus 2	FWD GGBAAYAAYAGYGGDCARCC REV GGCTCGATCACGAACCAAAA	2.0 µL cDNA template 10 µL GoTaq Green Master Mix 4.5 µL nuclease-free water 1.5 µL forward primer (20µM) 1.0 µL reverse primer (5µM) 1.0 µL BSA (10mg/mL)	94ºC for 1 min 37 x 94ºC for 1 min, 59ºC for 30 sec, 72ºC for 2 min 72ºC for 10 min	Gibbs A and Mackenzie A (1997) A primer pair for amplifying part of the genome of all potyvirids by RT-PCR. Journal of Virological Methods 63: 9-16. https://doi.org/10.1016/S0166-0934(96)02103-9 Mukasa S, Rubahaiyo P and Valkonen J (2003) Incidence of viruses and virus like diseases of sweetpotato in Uganda. Journal of Plant Disease 87: 329-335. https://doi.org/10.1094/PDIS.2003.87.4.329 Rukarwa …
Tobacco ringspot virus	TRSV	Nepovirus	Secoviridae	ssRNA(+) bipartite	Generic Nepovirus Group A PCR	FWD AATAAATCATAA-ACDTCWGARGGITAYCC REV RATDCCYACYTGRCWIGGCA	2.0 µL cDNA template 10 µL GoTaq Green Master Mix 5.0 µL nuclease-free water 1.0 µL forward primer (10µM) 1.0 µL reverse primer (10µM) 1.0 µL BSA (10mg/mL)	95ºC for 2 min 37 x 95ºC for 30 sec, 50ºC for 30 sec, 72ºC for 1 min 72ºC for 5 min	Wei T, Clover G (2008) Use of primers with 5’ non-complementary sequences in RT-PCR for the detection of nepovirus subgroups A and B. Journal of Virological Methods 153(1): 16-21. https://doi.org/10.1016/j.jviromet.2008.06.020

## Sheet: Supplementary_Table_3
Supplementary Table 3. General statistics of the sequencing runs derived with RNA-Seq and sRNA-Seq by SP1 and SP2. The table shows the starting number of reads that were initially sequenced, and the read count and read percentage obtained after removing low-quality reads. rRNA filter = number of remain-ing reads after removing sequences with sequence similarity to ribosomal RNAs. A) SP1 RNA-Seq. …
A) SP1 RNA-Seq
Samples	Total raw read pair counts	Quality filtered read pair counts	% quality filtered	rRNA filter	% rRNA filtered
MT001	37368471	35659051	4.5745	30695172	17.8581
MT002	36594526	35285924	3.57595	31053175	15.1426
MT003	37315138	35965774	3.61613	30988522	16.9546
MT004	37346245	35576496	4.73876	30342857	18.7526
MT005	36406853	34870640	4.21957	27107026	25.5442
MT007	38499133	34873254	9.41808	27077099	29.6683
MT008	39092247	36546841	6.51128	31030445	20.6225
MT010	37079827	35555226	4.11167	31974825	13.7676
MT011	38542466	36332934	5.73272	31203978	19.04
MT012	37519715	35883932	4.3598	30863996	17.7393
MT013	38185046	35949319	5.85498	30117474	21.1276
MT014	39152140	37271205	4.80417	31165458	20.3991
MT015	38617497	36928010	4.37493	30281618	21.5858
MT016	38982218	37573354	3.61412	29440470	24.4772
Average	3.79073e+07	3.60194e+07	4.96476	3.02387e+07	20.1914
SD	928598	828472	1.55425	1.46035e+06	4.22417
MIN	36406853	34870640	3.57595	27077099	13.7676
MAX	39152140	37573354	9.41808	31974825	29.6683
B) SP2 RNA-Seq
Samples	Total raw read pair counts	Quality filtered read pair counts	% quality filtered	rRNA filter	% rRNA filtered
MT001	50933156	48952931	3.88789	43777687	10.5719
MT002	43223508	40403906	6.52331	36085414	10.6883
MT003	55231033	52407195	5.11277	47595931	9.18054
MT004	44856144	41968266	6.43809	36822509	12.2611
MT005	45881983	42351486	7.69473	35706187	15.6908
MT010	37043958	35327555	4.63342	32757713	7.27433
MT013	36998009	34418240	6.97272	29200527	15.1597
MT014	59357867	56020128	5.62308	37393053	33.2507
MT016	46627590	43805484	6.05244	31033228	29.1568
Average	4.66837e+07	4.39617e+07	5.88205	3.6708e+07	15.9149
SD	7.53695e+06	7.30171e+06	1.19475	5.85845e+06	9.12225
MIN	36998009	34418240	3.88789	29200527	7.27433
MAX	59357867	56020128	7.69473	47595931	33.2507
C) SP1 sRNA-Seq
Samples	Total raw reads	Quality filtered reads	% quality filtered	rRNA filtered	% rRNA filtered
MT001	64265764	63246114	1.58661	54444983	15.2815
MT002	44385266	43401634	2.21612	20947245	52.8059
MT003	54475565	53557693	1.68492	48692132	10.6166
MT004	49994547	49079184	1.83093	42312236	15.3663
MT005	33987726	33323118	1.95544	19571911	42.4148
MT007	51999305	51043434	1.83824	43077162	17.1582
MT008	52201029	51161505	1.99139	42064407	19.4184
MT010	57197417	56114364	1.89353	52543702	8.13623
MT011	61507967	60491526	1.65254	50958732	17.151
MT012	68294075	67009691	1.88067	57907560	15.2085
MT013	58806682	57840767	1.64253	41712594	29.0683
MT014	74056679	72869502	1.60307	54290546	26.6905
MT015	54904346	53632801	2.31593	32879914	40.1142
MT016	50108405	49024137	2.16384	46608791	6.98409
Average	5.54418e+07	5.4414e+07	1.87541	4.34294e+07	22.601
SD	1.00191e+07	9.90619e+06	0.234467	1.18276e+07	13.859
MIN	33987726	33323118	1.58661	19571911	6.98409
MAX	74056679	72869502	2.31593	57907560	52.8059
D) SP2 sRNA-Seq
Samples	Total raw reads	Quality filtered reads	% quality filtered	rRNA filtered	% rRNA filtered
MT001	26951709	19964220	25.926	14845998	25.637
MT002	28287114	21784744	22.987	10943037	49.7674
MT003	24751876	22065089	10.8549	15983805	27.5607
MT004	27229338	22667878	16.752	16309126	28.0518
MT005	31784130	27315556	14.0591	16440186	39.8138
MT010	50844475	46138771	9.25509	39091965	15.2731
MT013	4424110	3833240	13.3557	2394675	37.5287
MT014	25587469	21341653	16.5933	14671152	31.2558
MT016	27674251	25587420	7.5407	20847802	18.5232
Average	2.75038e+07	2.3411e+07	15.2582	1.68364e+07	30.3791
SD	1.17689e+07	1.08455e+07	6.09912	9.77566e+06	10.732
MIN	4424110	3833240	7.5407	2394675	15.2731
MAX	50844475	46138771	25.926	39091965	49.7674

## Sheet: Supplementary_Table_4
Supplementary Table 4. De novo assembly statistics. A) Total number of assembled scaffolds using SPAdes and Trinity for ribodepleted RNA-Seq data. Similarly total number of assembled scaffolds using VirReport and VirusDetect tools using small RNA-Seq data are shown. All numbers are counts after merg-ing initially assembled contigs with CAP3. B) Total number of scaffolds with sequence similarity t…
A)	SP1								SP2
	SPAdes	Trinity	VirReport 21-22nt (SPAdes)	VirReport 24nt (SPAdes)	VirReport 21-22nt (Velvet)	VirReport 24nt (Velvet)	VirusDetect 21-22nt	VirusDetect 24nt	SPAdes	Trinity	VirReport 21-22nt (SPAdes)	VirReport 24nt (SPAdes)	VirReport 21-22nt (Velvet)	VirReport 24nt (Velvet)	VirusDetect 21-22nt	VirusDetect 24nt
MT001	58586	90007	171	670	2627	7306	925	1724	69236	101985	55	168	909	1586	218	1006
MT002	59302	87584	170	201	3952	3339	3141	1252	56206	80948	43	62	1020	1103	451	278
MT003	69758	96572	133	678	2153	6722	1221	1764	86657	112880	80	174	884	1516	428	615
MT004	55721	83325	116	1186	2147	4840	767	1583	64027	91149	45	97	840	1170	449	649
MT005	75755	94609	108	102	995	1198	467	344	79932	99863	48	48	659	477	385	125
MT007	69104	92585	72	441	1734	5735	1382	852	NT	NT	NT	NT	NT	NT	NT	NT
MT008	67783	95832	81	237	1991	4433	1485	600	NT	NT	NT	NT	NT	NT	NT	NT
MT010	116677	144987	85	256	1867	3732	251	459	107789	132256	110	75	842	859	209	231
MT011	57835	85020	170	332	2381	5599	1009	2533	NT	NT	NT	NT	NT	NT	NT	NT
MT012	199573	229108	283	284	4349	3477	3205	541	NT	NT	NT	NT	NT	NT	NT	NT
MT013	62250	90768	184	547	1958	8571	635	3393	65897	93111	92	94	266	265	312	80
MT014	66274	97372	203	983	2529	9051	1630	4305	72834	104146	105	103	956	1876	582	778
MT015	97935	123363	130	79	1735	1217	699	451	NT	NT	NT	NT	NT	NT	NT	NT
MT016	86985	107753	273	1126	2526	5002	1011	1164	89599	109775	63	338	1257	1350	378	413
Average	81681.3	108492	155.643	508.714	2353.14	5015.86	1273.43	1497.5	76908.6	102901	71.2222	128.778	848.111	1133.56	379.111	463.889
B)	SP1								SP2
Samples	SPAdes	Trinity	VirReport 21-22nt (SPAdes)	VirReport 24nt (SPAdes)	VirReport 21-22nt (Velvet)	VirReport 24nt (Velvet)	VirusDetect 21-22nt	VirusDetect 24nt	SPAdes	Trinity	VirReport 21-22nt (SPAdes)	VirReport 24nt (SPAdes)	VirReport 21-22nt (Velvet)	VirReport 24nt (Velvet)	VirusDetect 21-22nt	VirusDetect 24nt
MT001	31	32	1	5	8	18	66	94	13	11	3	2	10	12	22	67
MT002	8	13	18	3	96	39	202	55	17	37	12	3	72	22	13	44
MT003	42	48	70	64	220	171	139	255	20	44	43	4	228	119	122	213
MT004	43	57	31	4	289	32	213	185	22	29	8	2	189	17	177	55
MT005	18	20	39	2	143	21	60	88	18	52	11	0	117	6	54	16
MT007	70	72	9	7	77	29	143	136	NT	NT	NT	NT	NT	NT	NT	NT
MT008	79	86	10	12	72	30	168	97	NT	NT	NT	NT	NT	NT	NT	NT
MT010	45	69	1	4	32	16	64	10	22	32	27	6	14	15	18	5
MT011	74	94	69	9	600	171	541	383	NT	NT	NT	NT	NT	NT	NT	NT
MT012	81	182	68	20	242	83	223	213	NT	NT	NT	NT	NT	NT	NT	NT
MT013	21	28	28	20	176	57	75	153	11	17	14	6	130	41	160	0
MT014	37	43	85	16	314	163	93	229	11	28	43	8	289	130	108	146
MT015	21	30	31	5	165	49	174	50	NT	NT	NT	NT	NT	NT	NT	NT
MT016	29	19	84	258	185	130	79	85	9	11	22	22	160	108	23	77
Average	42.7857	56.6429	38.8571	30.6429	187.071	72.0714	160	145.214	15.8889	29	20.3333	5.88889	134.333	52.2222	77.4444	69.2222

## Sheet: Supplementary_Table_5
Supplementary Table 5. BLASTN results of assembled virus and viroid sequences obtained with RNA-Seq and sRNA-Seq. The searches were performed using megablast against the non-redundant NT database (SPAdes, Trinity and VirReport) and against a virus database plant_239_U100 (VirusDetect). The BLASTN results were summarized using BlastTools. The table shows the best reference hit recovered for each s…
SP1:			RNA-Seq								sRNA-Seq
			SPAdes				Trinity				VirReport SPAdes 21-22nt				VirReport SPAdes 24nt				VirReport Velvet 21-22nt				VirReport Velvet 24nt				VirusDetect 21-22nt				VirusDetect 24nt
Sample	Plant host	Virus/Viroid	sacc	slen	coverage	av-pident	sacc	slen	coverage	av-pident	sacc	slen	coverage	av-pident	sacc	slen	coverage	av-pident	sacc	slen	coverage	av-pident	sacc	slen	coverage	av-pident	sacc	slen	coverage*	%Identity*	sacc	slen	coverage*	%Identity*
MT001	Citrus	Citrus exocortis viroid	FJ904297	371	99.5	99.763	AF458772	371	99.5	99.413	KY110721	372	99.5	97.959	AY523582	371	99.5	99.255	KY110722	370	20.3	100	KY110722	370	28.1	100	KJ810547	375	100	97.04	KC290928	386	99.2	98.35
MT002	Prunus	Prunus necrotic ringspot virus RNA 1	KY883323	3352	99.9	98.957	KX650617	3333	100	98.86	KY883333	3300	35.5	99.081	ND	ND	ND	ND	MH727237	3332	41.2	99.384	MH727234	3332	10	99.408	KY883323	3352	99.8	98.97	KY883323	3352	71.6	99.05
		Prunus necrotic ringspot virus RNA 2	MH427284	2570	99.4	99.531	MF198442	2591	100	99.305	MH727229	2591	63.3	99.51	ND	ND	ND	ND	MH427284	2570	78.1	99.619	MH427284	2570	15.9	99.765	AF278535	2591	99.6	99.19	JN416775	2591	69.5	99.28
		Prunus necrotic ringspot virus RNA 3	MH427285	1929	90.8	98.916	MH427285	1929	27.7	95.349	KY883325	1978	50.7	98.5	KY883325	1978	11.2	98.206	MH427285	1929	50.4	99.532	MH427285	1929	39.1	99.38	KY883335	2045	90.7	98.07	KY883325	1978	98.9	98.41
MT003	Citrus	Citrus dwarfing viroid	JX259432	294	99.3	99.678	JX259432	294	69	100	ND	ND	ND	ND	AF434680	293	50.9	100	HQ219183	291	53.3	98.722	KU861554	294	56.8	100	EU382205	298	100	95.03	EU382205	298	100	95.03
		Citrus tristeza virus	EU857538	19251	95	99.173	KC525952	19253	99.9	96.015	EU857538	19251	79	99.262	EU857538	19251	3.2	98.722	EU857538	19251	70.3	99.301	EU857538	19251	19	99.282	EU857538	19251	99.5	98.4	EU857538	19251	89.2	99.11
		Citrus vein enation virus	MN187035	5983	99.4	98.79	MN187035	5983	99	98.785	MN187044	5982	18.7	99.2	ND	ND	ND	ND	MN187040	5983	42.8	99.504	MN187041	5983	6.2	99.738	HF679486	5983	98.7	98.27	MN187038	5983	54.2	98.67
		Hop stunt viroid	ND	ND	ND	ND	ND	ND	ND	ND	MG779543	221	72.4	99.379	ND	ND	ND	ND	MH995527	226	62.4	99.312	MH995527	226	73.9	100	KJ810551	309	100	96.86	AY513267	300	95.7	97.15
MT004	Citrus	Citrus exocortis viroid	EU512994	372	99.5	99.528	EU564170	372	99.7	99.194	KY110721	372	99.5	98.216	KY110721	372	99.5	98.215	KY110722	370	23.2	100	KX819231	371	28.6	100	KC290928	386	99.7	97.24	S67442	463	100	95.41
		Citrus tristeza virus	MK033511	19246	59.3	98.574	KC517492	19240	93.7	96.023	EU857538	19251	8.8	99.296	ND	ND	ND	ND	MF595989	19254	32.5	99.311	MK033511	19246	1.5	99.663	KC517493	19249	99.3	97.63	EU857538	19251	22.4	98.81
		Hop stunt viroid	MF979531	297	99.3	96.523	EU382209	300	99.3	98.929	EU382209	300	99.3	99.068	FJ716194	299	94	98.94	FJ716194	299	34.4	99.038	GQ260205	298	69.8	99.566	KJ810551	309	100	96.01	KJ810553	306	100	96.95
MT005	Rubus	Raspberry bushy dwarf virus RNA 1	KJ007639	5449	100	96.533	S51557	5449	99.9	95.448	KJ007639	5449	31.2	97.901	ND	ND	ND	ND	KJ007639	5449	47.1	98.109	KJ007639	5449	4.1	98.703	KJ007639	5449	85.8	97.6	AB948214	5449	21.7	96.68
		Raspberry bushy dwarf virus RNA 2	KJ007640	2231	54.9	98.643	KJ007640	2231	100	98.655	KJ007640	2231	41.1	99.461	AB948215	2231	1.7	97.368	KJ007640	2231	33.9	99.24	KJ007640	2231	10.8	100	AB948215	2231	99.9	96.89	KJ007640	2231	85	99
MT007	Citrus	Citrus dwarfing viroid	EU934020	293	99.3	100	KU861552	293	99.7	99.659	AJ630358	294	94.6	94.672	ND	ND	ND	ND	GQ246203	293	52.2	100	KY654681	294	38.1	99.126	EU564176	296	100	97.31	EU564176	296	96.6	96.85
		Hop stunt viroid	KY654683	299	99.3	98.564	EF126046	300	99.3	99.305	AY594208	298	37.9	99.123	KJ956807	303	41.3	99.206	KX156935	303	47.2	98.614	AY594208	298	33.6	100	KY508372	316	99.4	95.7	KY508372	316	99.4	94.59
MT008	Citrus	Citrus dwarfing viroid	AJ630358	294	99.7	94.932	KU861552	293	99.3	99.585	AJ630358	294	99.3	95.127	JX259433	293	89.8	99.621	GQ166530	293	35.5	100	JF812069	293	34.1	100	EU564176	296	100	96.38	EU564176	296	97	96.86
		Hop stunt viroid	EU519459	301	55.1	100	JX237456	301	68.8	99.038	AY594203	299	99.3	99.329	EF126046	300	43.3	99.237	KC878439	299	73.2	99.548	HE662806	299	28.1	100	KY508372	316	99.4	96.68	KY508372	316	99.4	94.02
MT010	Grass	Sorghum mosaic virus	KM025044	9624	88.2	74.953	KM025045	9624	88.2	74.982	KM025044	9624	88.2	75.011	KM025044	9624	65.3	75.587	KM025047	9629	1.9	80.396	KM025040	9621	1.9	87.217	KM025042	9624	11.7	82.97	KM025040	9621	13	83.43
MT011	Citrus	Citrus tristeza virus	AB046398	19302	96.2	98.376	KU361340	19256	70.3	93.83	AB046398	19302	58.4	97.368	Y18420	19259	1.5	93.956	KY110738	19243	43.1	98.915	MK491895	19252	16.5	99.366	AB046398	19302	100	96.24	JQ911664	19253	92.1	97.46
		Citrus viroid VI	KC769196	333	99.4	98.958	KC769197.1.	333	94	99.4	KC769196	333	67.9	100	KT692938	333	95.5	99.06	KC769197	333	65.5	98.63	KC769203	331	39.9	97.744	KC769196	333	100	100	LC427232	217	92.6	97.84
		Hop stunt viroid	HE575348	264	98.1	95.464	AB054609.1	303	100	99.34	MH995518	288	99.3	99.03	KC769196	303	83.8	99.608	KY110716	302	63.6	99.482	EU931258	303	47.2	99.306	KJ810551	309	100	96.38	KJ810553	306	100	98.28
MT012	Iris	Tobacco ringspot virus RNA1	U50869	7514	100	92.629	U50869	7514	99.9	92.608	KT692938	10423	56.1	93.507	KJ556850	7513	15.1	95.896	U50869	7514	36.7	96.047	KJ556849	7513	14.1	97.131	MN504759	7467	99.2	91.92	MN504768	7466	68.3	94.53
		Tobacco ringspot virus RNA2	AY363727	3929	88	92.586	KJ556850	3928	97.8	93.233	KJ556849	7513	94.5	92.016	KT250632	3749	7.6	95.503	KJ556850	3928	24.8	97.513	KJ556850	3928	13.2	97.97	MT210151	3890	98	93.38	AY363727	3929	92.1	95.72
		Iris severe mosaic virus	MF385582	10406	46.3	88.093	LC433737	10403	68.5	91.482	KJ556850	3928	79	94.496	M17439	10423	2.8	93.122	LC433737	10403	39	96.652	MF385582	10406	6.5	97.678	KT692938	10423	99.2	94.26	MF385582	10406	72.5	95.79
MT013	Fragaria	Strawberry mottle virus RNA 1	KU200453	7017	85.1	96.184	KU177218	7043	84.4	92.065	KU200453	7017	56.7	95.988	ND	ND	ND	ND	KU200456	7026	59.6	96.664	KU200453	7017	4.3	98.389	KU200456	7026	98.7	95.98	KU200456	7026	59.2	96.97
		Strawberry mottle virus RNA 2	KU200454	6338	99.9	85.422	KU200457	6327	99.8	96.456	KU200461	6319	59.3	96.574	ND	ND	ND	ND	KU200461	6319	52	97.6	KU200457	6327	4.2	98.528	KU200457	6327	89.7	97.08	KU200461	6319	62.5	97.62
MT014	Fragaria	Strawberry mottle virus RNA 1	KU200453	7017	85.1	96.268	KU200456	7026	100	95.859	KU200453	7017	38.6	95.942	ND	ND	ND	ND	KU200453	7017	51	96.839	KU200453	7017	2.6	99.462	KU200456	7026	98.8	95.75	KU200456	7026	54.9	97.33
		Strawberry mottle virus RNA 2	KU200457	6327	99.9	96.396	KU200457	6327	84	96.388	KU200461	6319	41.7	96.383	ND	ND	ND	ND	KU200461	6319	52.1	97.495	KU200461	6319	5.7	98.382	KU200457	6327	88.7	96.85	KU200461	6319	58.2	97.61
MT015	Fragaria	Strawberry mottle virus RNA 1	KU200458	7037	84.8	96.332	KU200453	7017	99.9	96.191	KU200456	7026	12.2	96.5	ND	ND	ND	ND	KU200453	7017	32.5	97.428	KU200460	7008	0.6	100	KU200453	7017	96	96.48	ND	ND	ND	ND
		Strawberry mottle virus RNA 2	KU200459	6333	99.8	85.548	KU200461	6319	100	96.582	KU200461	6319	11.5	98.495	ND	ND	ND	ND	KU200461	6319	38.5	97.381	KU200461	6319	0.7	100	KU200461	6319	94.7	97.35	ND	ND	ND	ND
MT016	Ipomoea	Sweet potato feathery mottle virus	MG656427	10806	100	98.168	MF572048	10777	100	98.32	MG656426	10540	31.4	98.32	MG680260	2602	13.7	99.163	MK778794	10804	34.1	99.439	MK778795	10804	18	99.664	MG656422	10892	99.7	97.35	MG656422	10892	97.3	97.62
SP2:			RNA-Seq								sRNA-Seq
			SPADES				Trinity				VirReport SPAdes 21-22nt				VirReport SPAdes 24nt				VirReport Velvet 21-22nt				VirReport Velvet 24nt				VirusDetect 21-22nt				VirusDetect 24nt
Sample	Plant host	Virus/Viroid	sacc	slen	coverage	av-pident	sacc	slen	coverage	av-pident	sacc	slen	coverage	av-pident	sacc	slen	coverage	av-pident	sacc	slen	coverage	av-pident	sacc	slen	coverage	av-pident	sacc	slen	coverage*	%Identity*	sacc	slen	coverage*	%Identity*
MT001	Citrus	Citrus exocortis viroid	KF973205	371	99.7	99.73	HQ284024	372	99.5	99.436	EF488055	371	33.2	100	JX259396	371	80.9	99.671	KY110722	370	36	100	KY110721	372	36.3	99.271	KC290928	386	100	96.99	AY671955	415	100	96.17
MT002	Prunus	Prunus necrotic ringspot virus RNA 1	LC382449	3332	99.7	98.897	KY883323	3352	99.8	98.508	MH727234	3332	21.1	99.434	ND	ND	ND	ND	LC382449	3332	56	99.39	MF198441	3332	4.3	98.63	KY883323	3352	99.1	99.04	JN416774	3332	43.3	98.54
		Prunus necrotic ringspot virus RNA 2	MF198442	2591	99.9	99.244	MH427284	2570	100	99.066	MH727228	2591	21.5	99.821	ND	ND	ND	ND	KY883334	2603	57	99.48	ND	ND	ND	ND	AF278535	2591	99.7	99.19	JN416775	2591	34.1	98.87
		Prunus necrotic ringspot virus RNA 3	JN416773	1943	97.3	98.509	MH427285	1929	99.5	98.326	JN416773	1943	44.4	98.495	S78312	1943	9.1	99.438	KY883322	1995	17	99.72	MH427285	1929	28.5	99.305	KY883325	1978	100	97.46	KY883325	1978	97.8	98.68
MT003	Citrus	Citrus dwarfing viroid	AF184147	294	99.3	100	JF970268	294	99.3	99.676	ND	ND	ND	ND	ND	ND	ND	ND	KU861553	294	49	100	KU861554	294	36.4	100	EU382205	298	100	94.76	AB054625	291	100	96.28
		Citrus tristeza virus	KC525952	19253	100	95.387	MG983922	672	36.5	100	EU857538	19251	42.4	99.216	ND	ND	ND	ND	EU857538	19251	53	99.32	EU857538	19251	11	99.348	EU857538	19251	99.8	98.17	EU857538	19251	80.5	99.1
		Citrus vein enation virus	MN187035	5983	99.1	98.786	MN187035	5983	99.1	98.786	ND	ND	ND	ND	ND	ND	ND	ND	MN187040	5983	30	99.63	ND	ND	ND	ND	HF679486	5983	94.4	98.53	ND	ND	ND	ND
		Hop stunt viroid	KJ956807	303	99.7	99.01	ND	ND	ND	ND	ND	ND	ND	ND	ND	ND	ND	ND	KX819241	302	18	100	KX819242	302	16.9	100	KY508372	316	99.4	97.81	MK425610	297	88.2	96.41
MT004	Citrus	Citrus exocortis viroid	EU512994	372	99.5	99.762	JX885865	372	99.7	99.194	EU512994	372	99.5	99.49	ND	ND	ND	ND	JX885865	372	26	100	KY110722	370	46.2	100	KC290928	386	99.5	97.03	AY671955	415	100	95.08
		Citrus tristeza virus	EU937519	19251	95.5	98.466	EU937519	19251	96.1	96.421	JQ798289	19302	2.1	92.789	ND	ND	ND	ND	KC517494	19249	20	98.82	ND	ND	ND	ND	KC517493	19249	97.3	97.91	ND	ND	ND	ND
		Hop stunt viroid	EU382209	300	99.3	99.136	EU382209	300	99.3	99.04	MF979531	297	99.3	96.584	EU382209	300	93.3	98.932	KF060659	299	48	99.43	FJ716204	299	41.8	99.206	KY508372	316	99.4	95.64	KY508372	316	99.4	94.59
MT005	Rubus	Raspberry bushy dwarf virus RNA 1	KJ007639	5449	55.1	100	KJ007639	5449	35.2	96.618	KJ007639	5449	3	96.407	ND	ND	ND	ND	KJ007639	5449	36	98.2	ND	ND	ND	ND	S51557	5449	90.1	95.94	ND	ND	ND	ND
		Raspberry bushy dwarf virus RNA 2	EU796089	2203	52.3	99.047	KJ007640	2231	65.4	97.949	KJ007640	2231	22.2	99.197	ND	ND	ND	ND	MH802010	2218	7	99.39	KJ007640	2231	4.9	99.105	AB948215	2231	99.8	96.87	KJ007640	2231	82	98.76
MT010	Grass	Sorghum mosaic virus	KM025044	9624	88.2	74.937	KM025045	9624	88.2	74.998	KM025040	9621	13.7	80.374	KM025045	9624	43.4	74.377	KM025039	9624	0.4	100	KM025046	9587	4	78.261	KC984972	849	40.2	89.03	ND	ND	ND	ND
MT013	Fragaria	Strawberry mottle virus RNA 1	KU177218	7043	99.7	93.025	KU200456	7026	91.3	95.996	KU200456	7026	1	97.059	ND	ND	ND	ND	KX249737	7868	9	97.82	KU177218	7043	0.6	97.619	KU200453	7017	74.5	97.08	ND	ND	ND	ND
		Strawberry mottle virus RNA 2	KU200457	6327	83.2	96.924	KU200457	6327	99.8	96.479	ND	ND	ND	ND	ND	ND	ND	ND	KU200457	6327	12	97	KU177219	6340	0.6	97.619	KU200461	6319	75.1	97.58	ND	ND	ND	ND
MT014	Fragaria	Strawberry mottle virus RNA 1	KU200458	7037	99.8	95.885	KU177218	7043	72.7	92.267	KU200458	7037	1.5	96.262	ND	ND	ND	ND	MH013324	5771	31	97.28	ND	ND	ND	ND	KU200456	7026	96.5	96.16	ND	ND	ND	ND
		Strawberry mottle virus RNA 2	KU200461	6319	82	96.391	KU200454	6338	99.8	85.324	KU200457	6327	4.5	98.613	ND	ND	ND	ND	KU200461	6319	37	97.84	ND	ND	ND	ND	KU200457	6327	93.5	96.83	ND	ND	ND	ND
MT016	Ipomoea	Sweet potato feathery mottle virus	MF572047	10824	99.9	98.262	MF572047	10824	99.9	98.243	MG656425	10806	23.1	98.803	MG656428	10620	12.4	99.025	MH782224	10820	20	98.94	MH782224	10820	17.3	98.941	MG656422	10892	97.27	97.77	MH778648	10820	88.8	97.25

## Sheet: Supplementary_Table_6
Supplementary Table 6. Total reads mapping to reference sequences derived from RNA-Seq and sRNA-Seq de novo assemblies. *We used the best homology hit (KT692938.1) for ISMV as we only obtained partial sequences matching this virus genome. ^If more than one virus or viroid strain was recovered in a sample, mapping was only performed against the most abundant strain. FPKM = fragments per kilobase o…
Sample	Virus/Viroid	Length	SP1 RNASEQ			SP1 sRNA			SP2 RNASeq			SP2 sRNA
			read counts	FPKM (based on quality filtered reads)	FPKM (based on quality filtered usable reads)	read counts	FPKM (based on quality filtered reads)	FPKM (based on quality filtered usable reads)	read counts	FPKM (based on quality filtered reads)	FPKM (based on quality filtered usable reads)	read counts	FPKM (based on quality filtered reads)	FPKM (based on quality filtered usable reads)
MT001	CEVd	371	662	36.4507	40.7597	522044	70482.4	94781.5	326	24.6419	28.6269	2577052	109829	127583
MT002	PNRSV_RNA1	3363	630557	4640.6	5195.96	32255	440.269	876.46	500184	4215.04	4789.57	134696	922.83	1912.06
	PNRSV_RNA2	2640	564676	5293.86	5927.39	17787	309.276	615.688	454811	4882.31	5547.8	65961	575.675	1192.77
	PNRSV_RNA3	1944	2750999	35024.4	39215.9	230887	5451.94	10853.4	1794473	26160.1	29725.9	1068599	12665.2	26241.7
MT003	CTV	20675	109239	100.819	111.01	187224	410.403	566.547	89698	121.948	142.982	608154	549.22	604.101
	CDVd	294	6	0.389415	0.42878	1088	167.717	231.527	3	0.286821	0.336293	19493	1237.97	1361.67
	CVEV	5933	69997	225.12	247.876	10575	80.7793	111.513	45978	215.47	250.078	94731	298.123	327.913
	HSVd	303	8	0.503798	0.554725	754	112.778	155.686	1	0.0917631	0.106502	8998	605.071	701.839
MT004	CEVd	371	1360	87.3462	99.5524	510703	60727.3	84404.2	600	45.4584	53.2992	2145966	117856	136705
	CTV^	18395	16721	21.6592	24.6859	23970	57.4854	79.8983	13285	20.3001	23.8016	57316	63.4861	73.6394
	HSVd	354	170	11.4426	13.0416	26287	3275.87	4553.1	77	6.11398	7.16854	234503	13497.3	15655.9
MT005	RBDV_RNA1	5506	355867	1526.1	1810.12	18188	120.931	200.929	268799	1400.01	1800.98	100770	549.224	935.108
	RBDV_RNA2	2309	1358267	13889.7	16474.7	41809	662.881	1101.38	655028	8135.35	10465.4	122139	1587.39	2702.7
MT010	SrMV	9730	7432074	21621.4	23317.6	16377705	36481.6	43057.9	7154030	20679.2	22994.8	20556493	37649.8	40208.3
MT013	SMoV_RNA1	7117	93360	381.132	449.235	2907	106.557	170.57	138667	541.983	646.93	204978	497.939	690.467
	SMoV_RNA2	5274	73908	407.158	479.911	2662	131.675	210.776	149839	790.304	943.336	194580	637.858	884.486
MT014	SMoV_RNA1	8475	56024	118.002	176.784	17768	98.236	142.901	64431	203.977	243.939	190717	308.819	414.501
	SMoV_RNA2	7117	57480	144.17	215.988	17827	117.369	170.733	64380	242.706	290.256	191466	369.189	495.531
MT016	SPFMV	10811	277185	585.296	826.184	900725	3256.12	3996.37	296437	729.771	931.369	2353159	4439.92	4670.01
MT007	CDVd	293	NT	NT	NT	NT	NT	NT	39	3.81684	4.91581	14534	971.802	1151.52
	HSVd	342	NT	NT	NT	NT	NT	NT	39	3.26999	4.2115	14596	836.119	990.742
MT008	CDVd	293	NT	NT	NT	NT	NT	NT	5	0.466931	0.549939	52708	3516.14	4276.56
	HSVd	302	NT	NT	NT	NT	NT	NT	1	0.0906031	0.10671	12636	817.823	994.69
MT011	CTV	19018	NT	NT	NT	NT	NT	NT	284334	411.494	479.131	433073	376.445	446.866
	CVd-VI	332	NT	NT	NT	NT	NT	NT	42	3.48186	4.05416	220476	10978.1	13031.8
	HSVd	302	NT	NT	NT	NT	NT	NT	29	2.64296	3.07738	220593	12075.1	14334
MT012	ISMV*	10423	NT	NT	NT	NT	NT	NT	8249	22.0551	25.6423	1281684	1835.06	2123.5
	TRSPV_RNA1	8315	NT	NT	NT	NT	NT	NT	2416389	8098.5	9415.7	4709881	8452.98	9781.66
	TRSPV_RNA2^	3847	NT	NT	NT	NT	NT	NT	2546806	18449	21449.7	4529703	17571.5	20333.5
MT015	SMoV_RNA1	5971	NT	NT	NT	NT	NT	NT	24389	110.609	134.886	29731	92.8393	151.437
	SMoV_RNA2	6316	NT	NT	NT	NT	NT	NT	50766	217.658	265.431	51715	152.667	249.025

## Sheet: Supplementary_Table_7
Supplementary Table 7: Virus table and implementation of a contamination flag (CF) for RNA-Seq results derived for SP1 using KODOJA. The threshold used for the CF was [(RMP/Max_RPM)*100] to be at least 1%. Read counts was derived from the stringent level assignment for viruses (i.e., same assignment designated by Kraken and Kaiju) and the non-stringent read assignment for viroids (as viroids do n…
A) Virus hits
Sample name	Species	Number of mapped sequences	Number of mapped sequences (stringent)	TP	RPM based on mapped sequences (stringent)	RPM_MAX	%_of_RPM_MAX	CF
MT001	Citrus tristeza virus	8	2		0.0267605	1187.68	0.00225318	Y
MT001	Citrus vein enation virus	5	4		0.0535211	797.009	0.00671524	Y
MT001	Prunus necrotic ringspot virus	701	450		6.02112	38460.6	0.0156553	Y
MT001	Raspberry bushy dwarf virus	161	97		1.29789	15329.5	0.0084666	Y
MT002	Citrus tristeza virus	19	1		0.0136632	1187.68	0.00115042	Y
MT002	Citrus vein enation virus	18	17		0.232275	797.009	0.0291434	Y
MT002	Prunus necrotic ringspot virus	3715880	2814893	TP	38460.6	38460.6	100	N
MT002	Raspberry bushy dwarf virus	178	102		1.39365	15329.5	0.00909132	Y
MT002	Tobacco ringspot virus	3	1		0.0136632	65337.3	2.09119e-05	Y
MT003	Citrus tristeza virus	80335	19619	TP	262.883	1187.68	22.1342	N
MT003	Citrus vein enation virus	63081	59481	TP	797.009	797.009	100	N
MT003	Prunus necrotic ringspot virus	547	334		4.4754	38460.6	0.0116363	Y
MT003	Raspberry bushy dwarf virus	216	142		1.90271	15329.5	0.0124121	Y
MT004	Citrus tristeza virus	18346	3934	TP	52.6693	1187.68	4.43465	N
MT004	Citrus vein enation virus	3	2		0.0267765	797.009	0.00335962	Y
MT004	Prunus necrotic ringspot virus	377	211		2.82492	38460.6	0.00734497	Y
MT004	Raspberry bushy dwarf virus	307	219		2.93202	15329.5	0.0191267	Y
MT005	Citrus tristeza virus	6	1		0.0137337	1187.68	0.00115635	Y
MT005	Citrus vein enation virus	5	2		0.0274674	797.009	0.0034463	Y
MT005	Prunus necrotic ringspot virus	327	189		2.59567	38460.6	0.0067489	Y
MT005	Raspberry bushy dwarf virus	1315911	1116196	TP	15329.5	15329.5	100	N
MT007	Citrus tristeza virus	93	30		0.389619	1187.68	0.0328051	Y
MT007	Iris severe mosaic virus	20	9		0.116886	2208.67	0.00529214	Y
MT007	Strawberry mottle virus	179	5		0.0649365	289.236	0.022451	Y
MT007	Sweet potato feathery mottle virus	29	23		0.298708	4494.82	0.00664561	Y
MT007	Tobacco ringspot virus	416	204		2.64941	65337.3	0.00405497	Y
MT008	Citrus tristeza virus	60	15		0.191854	1187.68	0.0161537	Y
MT008	Iris severe mosaic virus	37	22		0.281386	2208.67	0.0127401	Y
MT008	Strawberry mottle virus	63	5		0.0639513	289.236	0.0221104	Y
MT008	Sugarcane mosaic virus (potyvirus-like)	614	1		0.0127903	13.39	0.0955208	Y
MT008	Sweet potato feathery mottle virus	40	33		0.422079	4494.82	0.00939034	Y
MT008	Tobacco ringspot virus	771	431		5.5126	65337.3	0.00843715	Y
MT010	Citrus tristeza virus	51	15		0.202266	1187.68	0.0170304	Y
MT010	Iris severe mosaic virus	11785	8		0.107875	2208.67	0.00488419	Y
MT010	Sorghum mosaic virus (potyvirus-like)	2129146	217	TP	2.92612	2.92612	100	N
MT010	Sugarcane mosaic virus (potyvirus-like)	1217424	993	TP	13.39	13.39	100	N
MT010	Sweet potato feathery mottle virus	47	13		0.175297	4494.82	0.00389999	Y
MT010	Tobacco ringspot virus	355	160		2.15751	65337.3	0.00330211	Y
MT011	Citrus tristeza virus	371811	91552	TP	1187.68	1187.68	100	N
MT011	Iris severe mosaic virus	35	23		0.298372	2208.67	0.0135092	Y
MT011	Strawberry mottle virus	102	6		0.0778362	289.236	0.0269109	Y
MT011	Sweet potato feathery mottle virus	51	40		0.518908	4494.82	0.0115446	Y
MT011	Tobacco ringspot virus	1174	693		8.99008	65337.3	0.0137595	Y
MT012	Citrus tristeza virus	15	2		0.0266527	1187.68	0.0022441	Y
MT012	Iris severe mosaic virus	254061	165737	TP	2208.67	2208.67	100	N
MT012	Sweet potato feathery mottle virus	27	22		0.293179	4494.82	0.0065226	Y
MT012	Tobacco ringspot virus	7550795	4902873	TP	65337.3	65337.3	100	N
MT013	Citrus tristeza virus	38	13		0.170224	1187.68	0.0143325	Y
MT013	Iris severe mosaic virus	21	6		0.0785648	2208.67	0.00355712	Y
MT013	Strawberry mottle virus	537246	22089	TP	289.236	289.236	100	N
MT013	Sweet potato feathery mottle virus	37	30		0.392824	4494.82	0.00873948	Y
MT013	Tobacco ringspot virus	357	167		2.18672	65337.3	0.00334682	Y
MT014	Citrus tristeza virus	113	30		0.383121	1187.68	0.032258	Y
MT014	Iris severe mosaic virus	16	4		0.0510828	2208.67	0.00231283	Y
MT014	Strawberry mottle virus	231560	9798	TP	125.127	289.236	43.2613	N
MT014	Sweet potato feathery mottle virus	27	26		0.332038	4494.82	0.00738713	Y
MT014	Tobacco ringspot virus	297	142		1.81344	65337.3	0.0027755	Y
MT015	Citrus tristeza virus	19	5		0.0647375	1187.68	0.00545077	Y
MT015	Iris severe mosaic virus	10	6		0.077685	2208.67	0.00351728	Y
MT015	Strawberry mottle virus	145155	6739	TP	87.2532	289.236	30.1668	N
MT015	Sweet potato feathery mottle virus	36	27		0.349582	4494.82	0.00777745	Y
MT015	Tobacco ringspot virus	367	177		2.29171	65337.3	0.0035075	Y
MT016	Citrus tristeza virus	19	4		0.0513054	1187.68	0.00431981	Y
MT016	Iris severe mosaic virus	13	6		0.0769582	2208.67	0.00348437	Y
MT016	Strawberry mottle virus	66	4		0.0513054	289.236	0.0177382	Y
MT016	Sugarcane mosaic virus (potyvirus-like)	78	1		0.0128264	13.39	0.0957904	Y
MT016	Sweet potato feathery mottle virus	390386	350436	TP	4494.82	4494.82	100	N
MT016	Tobacco ringspot virus	358	163		2.0907	65337.3	0.00319985	Y
B) Viroid hits:
Sample name	Species	Number of mapped sequences	Number of mapped sequences (stringent)	TP	RPM based on Species sequences	RPM_MAX	%_of_RPM_MAX	CF
MT001	Citrus exocortis viroid	916	n.a.	TP	12.2563	15.1822	6033.36	N
MT001	Hop stunt viroid	2	n.a.		0.0267605	1.61998	123.459	N
MT002	Hop stunt viroid	2	n.a.		0.0273265	1.61998	123.459	N
MT003	Citrus dwarfing viroid	7	n.a.	TP	0.0937957	1.19483	585.856	N
MT003	Hop stunt viroid	2	n.a.	TP	0.0267988	1.61998	123.459	N
MT004	Citrus exocortis viroid	1134	n.a.	TP	15.1822	15.1822	7469.25	N
MT004	Hop stunt viroid	121	n.a.	TP	1.61998	1.61998	7469.25	N
MT005	Hop stunt viroid	1	n.a.		0.0137337	1.61998	61.7293	Y
MT007	Citrus dwarfing viroid	92	n.a.	TP	1.19483	1.19483	7699.83	N
MT007	Hop stunt viroid	34	n.a.	TP	0.441568	1.61998	2098.8	N
MT008	Citrus dwarfing viroid	17	n.a.	TP	0.217434	1.19483	1422.79	N
MT008	Hop stunt viroid	6	n.a.	TP	0.0767416	1.61998	370.376	N
MT011	Citrus viroid VI	150	n.a.	TP	1.94591	1.94591	7708.49	N
MT011	Hop stunt viroid	97	n.a.	TP	1.25835	1.61998	5987.75	N

## Sheet: Supplementary_Table_8
Supplementary Table 8: Virus detections and implementation of a contamination flag (CF) for RNA-Seq results derived for SP2 using KODOJA. The threshold used for the CF was >= 1%. True positives are highlighted in blue, index hopping events are highlighted in grey. RPM = reads per million; RPM_MAX = maximum observed RPM for a given virus/viroid in the same multiplexed sequencing run; TP = true pos…
Virus hits:
Sample name	Species	Number of matching sequences	Number of matching sequences (stringent)	TP	RPM based on Species sequences (stringent)	RPM_MAX	%_of_RPM_MAX	CF
MT001	Prunus necrotic ringspot virus	5	4		0.0408556	45661.8	8.94742e-05	Y
MT001	Raspberry bushy dwarf virus	5	3		0.0306417	25074.4	0.000122203	Y
MT001	Sweet potato feathery mottle virus	1	1		0.0102139	4289.98	0.000238087	Y
MT002	Prunus necrotic ringspot virus	5805692	3787404	TP	45661.8	45661.8	100	N
MT002	Raspberry bushy dwarf virus	2	2		0.0241125	25074.4	9.61637e-05	Y
MT002	Citrus vein enation virus	1	1		0.0120562	813.085	0.00148278	Y
MT002	Citrus tristeza virus	1	1		0.0120562	300.484	0.00401228	Y
MT003	Citrus vein enation virus	99517	85223	TP	813.085	813.085	100	N
MT003	Citrus tristeza virus	108928	31495	TP	300.484	300.484	100	N
MT003	Prunus necrotic ringspot virus	34	22		0.209895	45661.8	0.000459672	Y
MT003	Raspberry bushy dwarf virus	8	5		0.0477034	25074.4	0.000190247	Y
MT004	Citrus tristeza virus	26840	5784	TP	68.9092	300.484	22.9328	N
MT004	Prunus necrotic ringspot virus	13	11		0.131051	45661.8	0.000287004	Y
MT004	Raspberry bushy dwarf virus	2	2		0.0238275	25074.4	9.50274e-05	Y
MT005	Raspberry bushy dwarf virus	2671796	2123875	TP	25074.4	25074.4	100	N
MT005	Prunus necrotic ringspot virus	11	4		0.0472239	45661.8	0.000103421	Y
MT010	Potyvirus-like	1394535	3919	TP	55.4666	55.4666	100	N
MT010	Potyvirus-like	2629365	415	TP	5.8736	55.4666	10.5894	N
MT010	Potyvirus-like	614391	61	TP	0.863349	55.4666	1.55652	N
MT010	Potyvirus-like	1259621	58	TP	0.820889	55.4666	1.47997	N
MT010	Potyvirus-like	662265	43	TP	0.60859	55.4666	1.09722	N
MT010	Prunus necrotic ringspot virus	6	6		0.0849196	45661.8	0.000185975	Y
MT010	Raspberry bushy dwarf virus	4	4		0.056613	25074.4	0.00022578	Y
MT013	Strawberry mottle virus	338163	12021	TP	183.686	183.686	100	N
MT013	Prunus necrotic ringspot virus	4	4		0.0611218	45661.8	0.000133858	Y
MT013	Raspberry bushy dwarf virus	3	3		0.0458413	25074.4	0.000182821	Y
MT014	Strawberry mottle virus	207232	7019	TP	62.6471	183.686	34.1055	N
MT014	Prunus necrotic ringspot virus	7	3		0.0267761	45661.8	5.864e-05	Y
MT014	Raspberry bushy dwarf virus	3	1		0.00892536	25074.4	3.55955e-05	Y
MT016	Sweet potato feathery mottle virus	431172	375849	TP	4289.98	4289.98	100	N
MT016	Prunus necrotic ringspot virus	8	5		0.0570705	45661.8	0.000124985	Y
MT016	Raspberry bushy dwarf virus	2	2		0.0228282	25074.4	9.10419e-05	Y
MT016	Citrus vein enation virus	1	1		0.0114141	813.085	0.0014038	Y
Viroid hits:
Sample name	Species	Number of matching sequences	Number of matching sequences (stringent)	TP	RPM based on Species sequences	RPM_MAX	%_of_RPM_MAX	CF
MT001	Citrus exocortis viroid	2031	n.a.	TP	24.4862	31.3451	78.1181	N
MT003	Citrus dwarfing viroid	33	n.a.	TP	0.314842	0.314842	100	N
MT003	Hop stunt viroid	16	n.a.	TP	0.152651	4.06259	3.75747	N
MT004	Citrus exocortis viroid	2631	n.a.	TP	31.3451	31.3451	100	N
MT004	Hop stunt viroid	341	n.a.	TP	4.06259	4.06259	100	N

## Sheet: Supplementary_Table_9
Supplementary Table 9: Virus detections and implementation of a contamination flag (CF) for RNA-Seq results derived for SP1 using PVDP. The threshold used for the CF was >= 0.1%. True positives are highlighted in blue, index hopping events are highlighted in grey. RPM = reads per million; RPM_MAX = highest observed RPM for a given virus/viroid in the same multiplexed sequencing run; TP = true pos…
Virus hits
Sample	Species	Genus	Family	RPM	Reads	nr	Evalue	Similarity	Eveness	RD	Certainty	TP	RPM_MAX	%_of_RPM_MAX	CF
MT001	Citrus_tristeza_virus	Closterovirus	Closteroviridae	0.3	21	21	4.7e-45	98.8	0.6	8.52	97.5		14410.7	0.00208179	Y
MT001	Prunus_necrotic_ringspot_virus(RNA1)	Ilarvirus	Bromoviridae	1.9	135	127	1.7e-44	98.8	0.83	10.45	99.9		17752.2	0.0107029	Y
MT001	Prunus_necrotic_ringspot_virus(RNA2)	Ilarvirus	Bromoviridae	2	144	132	4.7e-45	98.8	0.87	11.22	99.9		16546	0.0120875	Y
MT001	Prunus_necrotic_ringspot_virus(RNA3)	Ilarvirus	Bromoviridae	13	927	608	2.2e-43	98.8	0.7	21.39	98.3		65453.2	0.0198615	Y
MT001	Raspberry_bushy_dwarf_virus(RNA1)	Idaeovirus	nd	0.5	36	36	3.7e-41	96.6	0.68	6.42	99.3		10115.1	0.0049431	Y
MT001	Raspberry_bushy_dwarf_virus(RNA2)	Idaeovirus	nd	1.5	106	104	4.7e-45	98.9	0.83	4.04	99.9		25188.9	0.005955	Y
MT002	Citrus_tristeza_virus	Closterovirus	Closteroviridae	0.6	44	43	3.6e-46	99.4	0.69	6.46	99.4		14410.7	0.00416357	Y
MT002	Citrus_vein_enation_virus	nd	nd	0.5	34	34	4.7e-45	98.8	0.66	11.86	98.6		1643.8	0.0304173	Y
MT002	Prunus_necrotic_ringspot_virus(RNA1)	Ilarvirus	Bromoviridae	17752.2	1251970	127927	2.2e-43	98.4	0.94	9.2	100	TP	17752.2	100	N
MT002	Prunus_necrotic_ringspot_virus(RNA2)	Ilarvirus	Bromoviridae	16546	1166903	94041	2.1e-43	98.6	0.94	6.61	100	TP	16546	100	N
MT002	Prunus_necrotic_ringspot_virus(RNA3)	Ilarvirus	Bromoviridae	65453.2	4616081	274822	2.8e-42	97.9	0.89	5.89	100	TP	65453.2	100	N
MT002	Raspberry_bushy_dwarf_virus(RNA1)	Idaeovirus	nd	0.7	48	48	1.8e-42	97.8	0.75	11.07	99.6		10115.1	0.00692035	Y
MT002	Raspberry_bushy_dwarf_virus(RNA2)	Idaeovirus	nd	1.5	108	103	1.7e-44	98.7	0.75	14.1	99.5		25188.9	0.005955	Y
MT003	Citrus_tristeza_virus	Closterovirus	Closteroviridae	3118.5	224240	56981	1.7e-44	99	0.97	5.99	100	TP	14410.7	21.6402	N
MT003	Citrus_vein_enation_virus	nd	nd	1643.8	118197	25265	6e-44	98.7	0.95	3.76	100	TP	1643.8	100	N
MT003	Prunus_necrotic_ringspot_virus(RNA1)	Ilarvirus	Bromoviridae	1.3	90	89	4.7e-45	98.8	0.81	10.46	99.9		17752.2	0.00732304	Y
MT003	Prunus_necrotic_ringspot_virus(RNA2)	Ilarvirus	Bromoviridae	1.4	98	98	4.7e-45	98.7	0.83	9.84	99.9		16546	0.00846126	Y
MT003	Prunus_necrotic_ringspot_virus(RNA3)	Ilarvirus	Bromoviridae	7.3	525	409	2.2e-43	98.7	0.78	14.08	99.7		65453.2	0.011153	Y
MT003	Raspberry_bushy_dwarf_virus(RNA1)	Idaeovirus	nd	0.6	45	45	1e-41	97.6	0.74	4.86	99.8		10115.1	0.00593173	Y
MT003	Raspberry_bushy_dwarf_virus(RNA2)	Idaeovirus	nd	2.5	178	173	4.7e-45	98.9	0.86	9.06	99.9		25188.9	0.00992501	Y
MT004	Citrus_tristeza_virus	Closterovirus	Closteroviridae	764.8	54401	30483	4.7e-45	99.2	0.98	1.48	100	TP	14410.7	5.30717	N
MT004	Prunus_necrotic_ringspot_virus(RNA1)	Ilarvirus	Bromoviridae	0.7	49	49	2.1e-43	98.4	0.76	10.8	99.7		17752.2	0.00394317	Y
MT004	Prunus_necrotic_ringspot_virus(RNA2)	Ilarvirus	Bromoviridae	0.5	39	39	2.2e-43	98.6	0.73	8.78	99.6		16546	0.00302188	Y
MT004	Prunus_necrotic_ringspot_virus(RNA3)	Ilarvirus	Bromoviridae	6.6	471	310	1.1e-39	98.5	0.58	28.55	84.5		65453.2	0.0100835	Y
MT004	Raspberry_bushy_dwarf_virus(RNA1)	Idaeovirus	nd	1.8	125	120	7.8e-43	97.3	0.86	4.7	100		10115.1	0.0177952	Y
MT004	Raspberry_bushy_dwarf_virus(RNA2)	Idaeovirus	nd	4	285	250	3.6e-46	99.4	0.88	8.21	100		25188.9	0.01588	Y
MT005	Prunus_necrotic_ringspot_virus(RNA1)	Ilarvirus	Bromoviridae	0.6	45	45	4.7e-45	98.6	0.74	10.91	99.6		17752.2	0.00337986	Y
MT005	Raspberry_bushy_dwarf_virus(RNA1)	Idaeovirus	nd	10115.1	705176	81507	3.6e-41	97.1	0.96	5.1	100	TP	10115.1	100	N
MT005	Raspberry_bushy_dwarf_virus(RNA2)	Idaeovirus	nd	25188.9	1756051	145184	2.2e-43	98.6	0.91	5.57	100	TP	25188.9	100	N
MT007	Citrus_tristeza_virus	Closterovirus	Closteroviridae	3.9	270	265	4.7e-45	98.4	0.91	3.41	100		14410.7	0.0270632	Y
MT007	Iris_severe_mosaic_virus	Potyvirus	Potyviridae	0.1	9	9	1.7e-39	96.6	0.44	9.78	76.8		5849.8	0.00170946	Y
MT007	putative_Potyvirus	Potyvirus	Potyviridae	5.5	380	54	1e-21	92.5	0.47	26.94	55.4		39580.5	0.0138957	Y
MT007	Strawberry_mottle_virus	nd	nd	4.4	305	297	9.9e-42	97.4	0.91	3.23	100		15622.9	0.0281638	Y
MT007	Sweet_potato_feathery_mottle_virus	Potyvirus	Potyviridae	0.5	32	31	7.9e-43	97.2	0.59	9.21	96.9		9782.2	0.00511132	Y
MT007	Tobacco_ringspot_virus_satellite_RNA	nd	nd	0.1	8	8	3.1e-34	96.7	0.45	9.87	79.2		3893.5	0.00256838	Y
MT007	Tobacco_ringspot_virus(RNA1)	Nepovirus	Secoviridae	1.8	126	126	6.1e-39	96.1	0.81	6.15	99.9		82196.3	0.00218988	Y
MT007	Tobacco_ringspot_virus(RNA2)	Nepovirus	Secoviridae	2.9	203	200	6.2e-39	96	0.86	6.83	99.9		101984	0.00284359	Y
MT008	Citrus_tristeza_virus	Closterovirus	Closteroviridae	1.9	141	138	1.7e-44	98.4	0.86	4.6	100		14410.7	0.0131846	Y
MT008	Iris_severe_mosaic_virus	Potyvirus	Potyviridae	0.5	34	34	1.4e-38	96.1	0.69	10.62	99.2		5849.8	0.0085473	Y
MT008	putative_Potyvirus	Potyvirus	Potyviridae	21.8	1589	1	6.3e-19	90.6	0.68	9.62	99.1		39580.5	0.0550776	Y
MT008	Strawberry_mottle_virus	nd	nd	1.2	91	91	3.6e-41	96.8	0.82	5.4	99.9		15622.9	0.00768103	Y
MT008	Sweet_potato_feathery_mottle_virus	Potyvirus	Potyviridae	0.9	64	60	1.5e-42	96.9	0.68	6.93	99.3		9782.2	0.00920038	Y
MT008	Tobacco_ringspot_virus_satellite_RNA	nd	nd	0.5	33	32	8.4e-41	97.1	0.65	17.11	97.5		3893.5	0.0128419	Y
MT008	Tobacco_ringspot_virus(RNA1)	Nepovirus	Secoviridae	6.3	460	436	1.7e-39	95.9	0.88	4.48	100		82196.3	0.00766458	Y
MT008	Tobacco_ringspot_virus(RNA2)	Nepovirus	Secoviridae	7.6	553	516	1.3e-40	96.6	0.9	6.68	100		101984	0.00745216	Y
MT010	Citrus_tristeza_virus	Closterovirus	Closteroviridae	1.9	138	133	1.7e-44	98.7	0.84	5.68	99.9		14410.7	0.0131846	Y
MT010	Iris_severe_mosaic_virus	Potyvirus	Potyviridae	0.2	11	11	7.9e-38	95.7	0.47	13.14	79.6		5849.8	0.00341892	Y
MT010	putative_Potyvirus	Potyvirus	Potyviridae	39580.5	2813620	26	1.1e-16	89.3	0.71	5.68	99.6	TP	39580.5	100	N
MT010	Strawberry_mottle_virus	nd	nd	0.9	62	62	1e-41	97.6	0.78	4.94	99.9		15622.9	0.00576077	Y
MT010	Tobacco_ringspot_virus_satellite_RNA	nd	nd	0.2	12	12	3.6e-41	97.1	0.51	16.57	84.1		3893.5	0.00513677	Y
MT010	Tobacco_ringspot_virus(RNA1)	Nepovirus	Secoviridae	2.2	156	155	2.6e-37	95.8	0.84	4.63	99.9		82196.3	0.00267652	Y
MT010	Tobacco_ringspot_virus(RNA2)	Nepovirus	Secoviridae	2.9	209	209	1.7e-39	95.8	0.86	8.94	99.9		101984	0.00284359	Y
MT011	Citrus_tristeza_virus	Closterovirus	Closteroviridae	14410.7	1046897	249563	2.2e-43	97.9	0.99	2.28	100	TP	14410.7	100	N
MT011	Iris_severe_mosaic_virus	Potyvirus	Potyviridae	0.6	45	43	4.8e-40	96.4	0.68	10.58	99.1		5849.8	0.0102568	Y
MT011	putative_Potyvirus	Potyvirus	Potyviridae	0.3	24	23	2.9e-22	90.1	0.44	19.6	59.5	TP	39580.5	0.000757949	Y
MT011	Strawberry_mottle_virus	nd	nd	1.7	127	126	1e-41	97.3	0.87	4.7	100		15622.9	0.0108815	Y
MT011	Sweet_potato_feathery_mottle_virus	Potyvirus	Potyviridae	0.7	53	53	7.5e-43	98.4	0.7	5.66	99.5		9782.2	0.00715585	Y
MT011	Tobacco_ringspot_virus_satellite_RNA	nd	nd	0.4	27	24	4.8e-40	97.1	0.6	19.31	94		3893.5	0.0102735	Y
MT011	Tobacco_ringspot_virus(RNA1)	Nepovirus	Secoviridae	9.8	715	638	4.8e-40	96.1	0.89	5.7	100		82196.3	0.0119227	Y
MT011	Tobacco_ringspot_virus(RNA2)	Nepovirus	Secoviridae	11.2	814	735	3.7e-41	96.6	0.92	7.66	100		101984	0.0109821	Y
MT012	Citrus_tristeza_virus	Closterovirus	Closteroviridae	0.4	28	28	1.8e-42	97.6	0.64	5.27	98.9		14410.7	0.00277572	Y
MT012	Iris_severe_mosaic_virus	Potyvirus	Potyviridae	5849.8	419709	106673	1.7e-39	95.9	0.93	8.25	100	TP	5849.8	100	N
MT012	putative_Potyvirus	Potyvirus	Potyviridae	18.1	1297	64422	1.1e-11	90.3	0.49	17.55	78.4		39580.5	0.0457296	Y
MT012	Strawberry_mottle_virus	nd	nd	0.8	58	58	1.1e-39	96.5	0.82	3.32	99.9		15622.9	0.00512069	Y
MT012	Sweet_potato_feathery_mottle_virus	Potyvirus	Potyviridae	0.3	23	23	3.7e-41	97.9	0.63	10.35	98.1		9782.2	0.00306679	Y
MT012	Tobacco_ringspot_virus_satellite_RNA	nd	nd	3893.5	279352	39062	2.2e-38	96.1	0.85	13.43	99.9	TP	3893.5	100	N
MT012	Tobacco_ringspot_virus(RNA1)	Nepovirus	Secoviridae	82196.3	5897409	679452	2.2e-38	95.3	0.9	5.16	100	TP	82196.3	100	N
MT012	Tobacco_ringspot_virus(RNA2)	Nepovirus	Secoviridae	101984	7317120	781095	2.2e-38	95.5	0.92	8.25	100	TP	101984	100	N
MT013	Citrus_tristeza_virus	Closterovirus	Closteroviridae	1.4	98	97	4.7e-45	98.5	0.8	2.7	99.9		14410.7	0.009715	Y
MT013	Iris_severe_mosaic_virus	Potyvirus	Potyviridae	0.2	12	12	4.8e-40	96.4	0.49	15.76	80.8		5849.8	0.00341892	Y
MT013	Strawberry_mottle_virus	nd	nd	15622.9	1122733	251582	1.3e-40	96.8	0.97	3.83	100	TP	15622.9	100	N
MT013	Sweet_potato_feathery_mottle_virus	Potyvirus	Potyviridae	0.5	35	34	1.9e-41	97.7	0.61	5.26	98.3		9782.2	0.00511132	Y
MT013	Tobacco_ringspot_virus(RNA1)	Nepovirus	Secoviridae	1.8	127	126	2.2e-38	95.8	0.82	6.9	99.9		82196.3	0.00218988	Y
MT013	Tobacco_ringspot_virus(RNA2)	Nepovirus	Secoviridae	2	147	145	2.2e-38	96.2	0.84	14.06	99.9		101984	0.00196109	Y
MT014	Citrus_tristeza_virus	Closterovirus	Closteroviridae	0.1	8	8	4.2e-31	90.5	0.41	9.62	68.4		14410.7	0.000693929	Y
MT014	putative_Potyvirus	Potyvirus	Potyviridae	13.2	980	13	2.3e-12	84.4	0.64	23.75	95.1		39580.5	0.0333498	Y
MT014	Strawberry_mottle_virus	nd	nd	118.7	8841	5226	3.6e-35	92.7	0.78	17.86	99.6	TP	15622.9	0.759782	N
MT015	Citrus_tristeza_virus	Closterovirus	Closteroviridae	0.6	44	43	1e-41	95.6	0.64	14.46	97.7		14410.7	0.00416357	Y
MT015	Strawberry_mottle_virus	nd	nd	4117.7	303968	93319	3.6e-41	97	0.97	7.36	100	TP	15622.9	26.3568	N
MT015	Sweet_potato_feathery_mottle_virus	Potyvirus	Potyviridae	0.6	42	41	2.2e-43	97.8	0.69	8.11	99.3		9782.2	0.00613359	Y
MT015	Tobacco_ringspot_virus(RNA1)	Nepovirus	Secoviridae	1.8	135	135	8e-38	95.3	0.82	4.3	99.9		82196.3	0.00218988	Y
MT015	Tobacco_ringspot_virus(RNA2)	Nepovirus	Secoviridae	2.2	162	162	1e-36	95.6	0.88	9.76	100		101984	0.0021572	Y
MT016	Citrus_tristeza_virus	Closterovirus	Closteroviridae	0.7	54	54	2.2e-43	98.3	0.75	5.9	99.8		14410.7	0.0048575	Y
MT016	putative_Potyvirus	Potyvirus	Potyviridae	3.3	249	58	2.9e-22	91.8	0.57	25.18	86.2		39580.5	0.00833744	Y
MT016	Strawberry_mottle_virus	nd	nd	1	73	73	1.3e-40	97.4	0.76	5.36	99.8		15622.9	0.00640086	Y
MT016	Sweet_potato_feathery_mottle_virus	Potyvirus	Potyviridae	9782.2	734843	109534	2.2e-43	98.4	0.94	6.17	100	TP	9782.2	100	N
MT016	Tobacco_ringspot_virus_satellite_RNA	nd	nd	0.2	12	12	3.3e-39	97.3	0.45	12.99	74.7		3893.5	0.00513677	Y
MT016	Tobacco_ringspot_virus(RNA1)	Nepovirus	Secoviridae	1.9	144	142	7.9e-38	95.7	0.85	5.25	99.9		82196.3	0.00231154	Y
MT016	Tobacco_ringspot_virus(RNA2)	Nepovirus	Secoviridae	2.1	159	155	8e-38	96.2	0.85	8.85	99.9		101984	0.00205915	Y
Viroid hits:
Sample	Species	Genus	Family	RPM	Reads	nr	Evalue	Similarity	Eveness	RD	Certainty	TP	RPM_MAX	%_of_RPM_MAX	CF
MT001	Citrus exocortis viroid	nd	nd	23.3	1659	828	1e-41	98.2	0.85	9.1	99.9	TP	27.6	84.4203	N
MT003	Citrus dwarfing viroid	nd	nd	0.2	11	11	7.9e-38	97.2	0.49	12.49	84.6	TP	2.2	9.09091	N
MT004	Citrus exocortis viroid	nd	nd	27.6	1960	902	3.7e-41	97.9	0.88	7.96	100	TP	27.6	100	N
MT004	Hop stunt viroid	nd	nd	3	213	140	6e-39	96.1	0.81	10.63	99.9	TP	3	100	N
MT007	Citrus dwarfing viroid	nd	nd	2.2	156	121	7.9e-38	97.1	0.85	7.77	99.9	TP	2.2	100	N
MT007	Hop stunt viroid	nd	nd	0.9	63	59	1.3e-40	97.7	0.76	10.26	99.7	TP	3	30	N
MT008	Citrus dwarfing viroid	nd	nd	0.4	31	28	1.8e-37	95.9	0.67	10.24	98.9	TP	2.2	18.1818	N
MT008	Hop stunt viroid	nd	nd	0.2	11	11	1e-41	97.6	0.49	14.42	82.5	TP	3	6.66667	N
MT011	Citrus viroid VI	nd	nd	3.8	278	220	8e-38	96.4	0.85	12.23	99.9	TP	3.8	100	N
MT011	Hop stunt viroid	nd	nd	2.5	178	144	1e-41	98	0.81	10.6	99.9	TP	3	83.3333	N

## Sheet: Supplementary_Table_10
Supplementary Table 10: Virus detections and implementation of a contamination flag (CF) for RNA-Seq results derived for SP2 using PVDP The threshold used for the CF was >= 0.1%. True positives are highlighted in blue, index hopping events are highlighted in grey. One false positive virual call was missed by the CF and is indicated in red. RPM = reads per million; RPM_MAX = highest observed RPM f…
Virus hits:
Sample	Species	Genus	Family	RPM	Reads	nr	Evalue	Similarity	Eveness	RD	Certainty	TP	RPM_MAX	%_of_RPM_MAX	CF
MT001	Raspberry bushy dwarf virus(RNA2)	Idaeovirus	nd	0.1	8	8	4.7e-45	99.4	0.45	17.6	66.8		47667.4	0.000209787	Y
MT002	Prunus necrotic ringspot virus(RNA1)	Ilarvirus	Bromoviridae	21870.7	1814055	235159	7.8e-43	98.2	0.96	3.09	100	TP	21870.7	100	N
MT002	Prunus necrotic ringspot virus(RNA2)	Ilarvirus	Bromoviridae	19379.2	1607401	190896	2.2e-43	98.4	0.95	4.82	100	TP	19379.2	100	N
MT002	Prunus necrotic ringspot virus(RNA3)	Ilarvirus	Bromoviridae	102395	8493083	653411	1e-41	97.6	0.93	3.97	100	TP	102395	100	N
MT003	Citrus tristeza virus	Closterovirus	Closteroviridae	2877.4	301595	105152	6e-44	98.5	0.95	13.63	100	TP	2877.4	100	N
MT003	Citrus vein enation virus	nd	nd	1819.3	190689	59333	2.2e-43	98.2	0.98	2.87	100	TP	1819.3	100	N
MT003	Prunus necrotic ringspot virus(RNA1)	Ilarvirus	Bromoviridae	0.2	18	16	3e-45	99.2	0.55	10.72	93.9		21870.7	0.000914465	Y
MT003	Raspberry bushy dwarf virus(RNA2)	Idaeovirus	nd	0.1	8	8	8.2e-46	99.6	0.45	12.16	75.9		47667.4	0.000209787	Y
MT004	Citrus tristeza virus	Closterovirus	Closteroviridae	1015.7	85255	49731	1.7e-44	98.8	0.98	5.15	100	TP	2877.4	35.2992	N
MT004	Prunus necrotic ringspot virus(RNA2)	Ilarvirus	Bromoviridae	0.1	8	8	2.3e-46	99.5	0.45	18.07	65.9		19379.2	0.000516017	Y
MT005	Prunus necrotic ringspot virus(RNA1)	Ilarvirus	Bromoviridae	0.1	12	12	1.2e-43	96.8	0.51	8.65	91		21870.7	0.000457233	Y
MT005	Raspberry bushy dwarf virus(RNA1)	Idaeovirus	nd	12016.8	1017861	209765	4.3e-40	96.7	0.97	3.66	100	TP	12016.8	100	N
MT005	Raspberry bushy dwarf virus(RNA2)	Idaeovirus	nd	47667.4	4037567	548164	7.7e-43	98.2	0.94	7.67	100	TP	47667.4	100	N
MT010	putative Potyvirus	Potyvirus	Potyviridae	51904.1	3667291	102	1e-16	88.7	0.73	8.47	99.6	TP	51904.1	100	N
MT013	Prunus necrotic ringspot virus(RNA3)	Ilarvirus	Bromoviridae	317.6	20784	5827	2.8e-27	96.3	0.48	25.78	61.3		102395	0.310173	N
MT013	Strawberry mottle virus	nd	nd	11259.4	736847	243463	1.3e-40	96.9	0.97	5.45	100	TP	11259.4	100	N
MT013	Strawberry vein banding virus	Caulimovirus	Caulimoviridae	13737.4	899015	212959	4.8e-40	96.4	0.98	3.21	100	TP	13737.4	100	N
MT014	Strawberry mottle virus	nd	nd	4073.7	456422	162228	3.6e-41	96.9	0.96	7.14	100	TP	11259.4	36.1804	N
MT014	Strawberry vein banding virus	Caulimovirus	Caulimoviridae	8318	931950	220782	4.8e-40	96.4	0.98	3.61	100	TP	13737.4	60.55	N
MT016	Sweet potato feathery mottle virus	Potyvirus	Potyviridae	9085.2	795967	206041	2.2e-43	98.2	0.99	3.89	100	TP	9085.2	100	N
Viroid hits:
Sample	Species	Genus	Family	RPM	Reads	nr	Evalue	Similarity	Eveness	RD	Certainty	TP	RPM_MAX	%_of_RPM_MAX	CF
MT001	Citrus exocortis viroid	nd	nd	39.3	3845	1715	3.6e-41	97.8	0.87	7.39	100	TP	60	65.5	N
MT003	Citrus dwarfing viroid	nd	nd	0.6	62	50	6.4e-37	96.2	0.73	22.62	98.8	TP	0.6	100	N
MT003	Hop stunt viroid	nd	nd	0.3	29	25	3.7e-41	97.2	0.64	18.85	96.7	TP	7.7	3.8961	N
MT004	Citrus exocortis viroid	nd	nd	60	5037	1922	1.3e-40	97.6	0.87	8.71	99.9	TP	60	100	N
MT004	Hop stunt viroid	nd	nd	7.7	644	386	2.2e-38	95.9	0.88	9.9	100	TP	7.7	100	N

[truncated: 5 more sheets: Supplementary_Table_11, Supplementary_Table_12, Supplementary_Table_13, Supplementary Table 14, Supplementary Table 15]
